# Supplementary material
Source: PubMed Central journal article supplement (PMC3009767)
Supplement: 1011666107_pnas.1011666107_SI.pdf [file 1011666107_pnas.1011666107_SI.pdf]

# Supporting Information

Neuweiler et al. 10.1073/pnas.1011666107

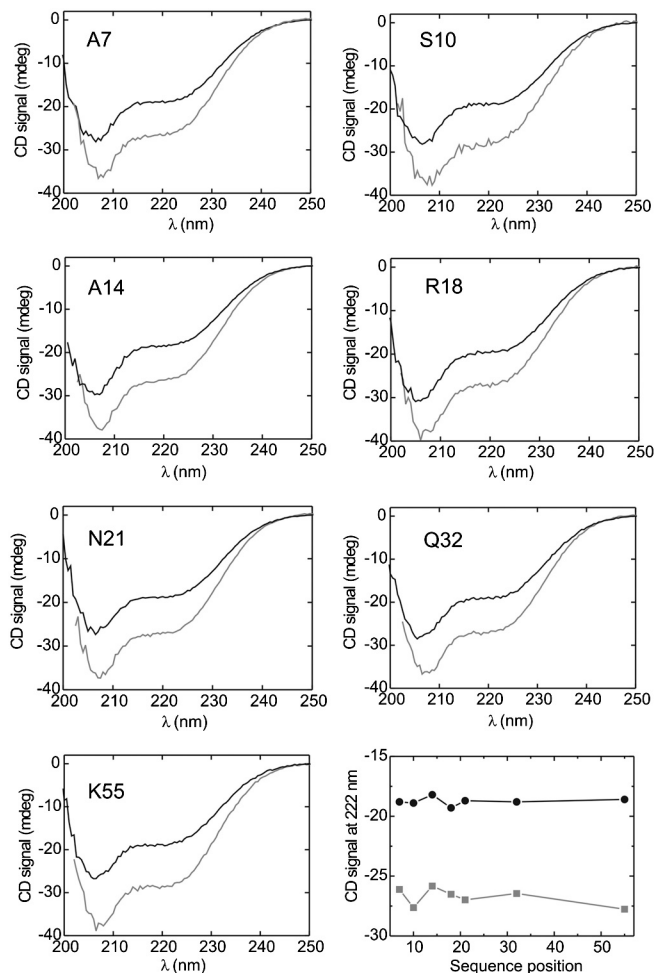

**Fig. S1.** Far-UV circular dichroism spectroscopy of modified EnHD-L16A. Recorded spectra of the individual single point mutants modified with AttoOxa11 at low (black) and high (gray) solution ionic strength. All measurements were performed at identical sample concentration. The spectra at high and low ionic strength resemble those of wild-type and denatured proteins, respectively. The lower right panel shows the measured ellipticities at the absorption maximum of helical secondary structure plotted as function of probe position. The amplitude of the change in ellipticity between low and high ionic strength conditions remains essentially constant. Accordingly, consistent with the kinetic data, there is no evidence for significant probe-induced, position-dependent perturbations of the folding equilibrium.
